# Supplementary material
Source: publisher figshare collection journal article supplement (https://acs.figshare.com/ndownloader/files/4499626)
Supplement: Supplementary file 1 [file 4499626]

data_Compound4
_publ_requested_journal          Inorg.Chem.
_publ_contact_author_name        'Dr. Pierre Braunstein'
_publ_contact_author_address     
;Laboratoire de Chimie de Coordination
CNRS-Universit\'e de Strasbourg
Institut Le Bel - 4 rue Blaise Pascal
67070 Strasbourg Cedex - France
;
_publ_contact_author_email       braunst@chimie.u-strasbg.fr
_publ_contact_author_phone       +33(0)368851308
_publ_contact_author_fax         +33(0)368851322
loop_
_publ_author_name
_publ_author_address
'Braunstein, Pierre '
;Laboratoire de Chimie de Coordination
CNRS-Universit\'e de Strasbourg
Institut Le Bel - 4 rue Blaise Pascal
67070 Strasbourg Cedex - France
;

'Pattacini, Roberto'
;Laboratoire de Chimie de Coordination
CNRS-Universit\'e de Strasbourg
Institut Le Bel - 4 rue Blaise Pascal
67070 Strasbourg Cedex - France
;
'Zhang, Jing'
;Laboratoire de Chimie de Coordination
CNRS-Universit\'e de Strasbourg
Institut Le Bel - 4 rue Blaise Pascal
67070 Strasbourg Cedex - France
;
_audit_creation_method           SHELXL-97
_chemical_name_systematic        ?
_chemical_name_common            ?
_chemical_formula_moiety         'C27 H42 Cl2 N3 O4 P Pd2'
_chemical_formula_sum            'C27 H42 Cl2 N3 O4 P Pd2'
_chemical_melting_point          ?

_exptl_crystal_description       prism
_exptl_crystal_colour            yellow

_diffrn_ambient_temperature      173(2)
_chemical_formula_weight         787.31

loop_
_atom_type_symbol
_atom_type_description
_atom_type_scat_dispersion_real
_atom_type_scat_dispersion_imag
_atom_type_scat_source
Pd Pd -0.9988 1.0072 'International Tables Vol C Tables 4.2.6.8 and 6.1.1.4'
P P 0.1023 0.0942 'International Tables Vol C Tables 4.2.6.8 and 6.1.1.4'
N N 0.0061 0.0033 'International Tables Vol C Tables 4.2.6.8 and 6.1.1.4'
Cl Cl 0.1484 0.1585 'International Tables Vol C Tables 4.2.6.8 and 6.1.1.4'
O O 0.0106 0.0060 'International Tables Vol C Tables 4.2.6.8 and 6.1.1.4'
C C 0.0033 0.0016 'International Tables Vol C Tables 4.2.6.8 and 6.1.1.4'
H H 0.0000 0.0000 'International Tables Vol C Tables 4.2.6.8 and 6.1.1.4'

_symmetry_cell_setting           orthorhombic
_symmetry_space_group_name_H-M   'P b c a'
_symmetry_int_tables_number      61
_chemical_absolute_configuration ?

loop_
_symmetry_equiv_pos_as_xyz
'x, y, z'
'-x+1/2, -y, z+1/2'
'x+1/2, -y+1/2, -z'
'-x, y+1/2, -z+1/2'
'-x, -y, -z'
'x-1/2, y, -z-1/2'
'-x-1/2, y-1/2, z'
'x, -y-1/2, z-1/2'

_cell_length_a                   11.330(1)
_cell_length_b                   17.826(2)
_cell_length_c                   31.961(3)
_cell_angle_alpha                90.00
_cell_angle_beta                 90.00
_cell_angle_gamma                90.00
_cell_volume                     6455.1(11)
_cell_formula_units_Z            8
_cell_measurement_temperature    173(2)
_cell_measurement_reflns_used     44851
_cell_measurement_theta_min        0.998
_cell_measurement_theta_max        30.034
_exptl_crystal_size_max          0.17
_exptl_crystal_size_mid          0.15
_exptl_crystal_size_min          0.13
_exptl_crystal_density_meas      ?
_exptl_crystal_density_diffrn    1.620
_exptl_crystal_density_method    'not measured'
_exptl_crystal_F_000             3184
_exptl_absorpt_coefficient_mu    1.365
_exptl_absorpt_correction_type   none
_exptl_absorpt_correction_T_min ?
_exptl_absorpt_correction_T_max  ?
_exptl_absorpt_process_details   ?

_exptl_special_details           
;
 ?
;
_diffrn_radiation_probe          x-ray
_diffrn_radiation_type           MoK\a
_diffrn_radiation_wavelength     0.71069
_diffrn_source                   'fine-focus sealed tube'
_diffrn_radiation_monochromator  graphite
_diffrn_measurement_device_type  KappaCCD
_diffrn_measurement_method       CCD
_diffrn_detector_area_resol_mean 9
_diffrn_standards_number         ?
_diffrn_standards_interval_count ?
_diffrn_standards_interval_time  ?
_diffrn_standards_decay_%        ?
_diffrn_reflns_number            42849
_diffrn_reflns_av_R_equivalents  0.0691
_diffrn_reflns_av_sigmaI/netI    0.0515
_diffrn_reflns_limit_h_min       -14
_diffrn_reflns_limit_h_max       14
_diffrn_reflns_limit_k_min       -22
_diffrn_reflns_limit_k_max       20
_diffrn_reflns_limit_l_min       -40
_diffrn_reflns_limit_l_max       39
_diffrn_reflns_theta_min         1.27
_diffrn_reflns_theta_max         27.00
_reflns_number_total             7040
_reflns_number_gt                5406
_reflns_threshold_expression     >2sigma(I)

_computing_data_collection        'Collect (Nonius B.V., 1998)' 
 _computing_cell_refinement        'Denzo (Nonius B.V., 1998)' 
 _computing_data_reduction       'Denzo (Nonius B.V., 1998)' 
_computing_structure_solution     'SHELXS-97 (Sheldrick, 1997)' 
_computing_structure_refinement   'SHELXL-97 (Sheldrick, 1997)' 
 _computing_molecular_graphics     'ATOMS V6 (Dowty, 2001)' 
_computing_publication_material   'SHELXL-97 (Sheldrick, 1997)'  

_refine_special_details          
;
 Refinement of F^2^ against ALL reflections.  The weighted R-factor wR and
 goodness of fit S are based on F^2^, conventional R-factors R are based
 on F, with F set to zero for negative F^2^. The threshold expression of
 F^2^ > 2sigma(F^2^) is used only for calculating R-factors(gt) etc. and is
 not relevant to the choice of reflections for refinement.  R-factors based
 on F^2^ are statistically about twice as large as those based on F, and R-
 factors based on ALL data will be even larger.
The tBu group was found disordered in two positions, with equal 
occupancy factors and having the quaternary carbon in common. 
The methyl carbon atoms were refined with restrained anisotropic 
thermal parameters and C-C bond distances.
;

_refine_ls_structure_factor_coef Fsqd
_refine_ls_matrix_type           full
_refine_ls_weighting_scheme      calc
_refine_ls_weighting_details     
; calc
 [0.00000+1.00000exp(1.00(sin\q/\l)^2^)]/
   [\s^2^(Fo^2^)+0.0000+0.0000*P+(0.0550P)^2^+0.0000sin\q/\l]
 where P = 0.33333Fo^2^ + 0.66667Fc^2^
;
_atom_sites_solution_primary     direct
_atom_sites_solution_secondary   difmap
_atom_sites_solution_hydrogens   geom
_refine_ls_hydrogen_treatment    constr
_refine_ls_extinction_method     none
_refine_ls_extinction_coef       ?
_refine_ls_number_reflns         7040
_refine_ls_number_parameters     394
_refine_ls_number_restraints     42
_refine_ls_R_factor_all          0.0582
_refine_ls_R_factor_gt           0.0342
_refine_ls_wR_factor_ref         0.1004
_refine_ls_wR_factor_gt          0.0824
_refine_ls_goodness_of_fit_ref   1.143
_refine_ls_restrained_S_all      1.143
_refine_ls_shift/su_max          0.001
_refine_ls_shift/su_mean         0.000

loop_
_atom_site_label
_atom_site_type_symbol
_atom_site_fract_x
_atom_site_fract_y
_atom_site_fract_z
_atom_site_U_iso_or_equiv
_atom_site_adp_type
_atom_site_occupancy
_atom_site_symmetry_multiplicity
_atom_site_calc_flag
_atom_site_refinement_flags
_atom_site_disorder_assembly
_atom_site_disorder_group
Pd1 Pd 0.40415(2) 0.122418(14) 0.107285(8) 0.02067(9) Uani 1 1 d . . .
Pd2 Pd 0.50506(2) 0.243320(14) 0.127401(8) 0.02025(9) Uani 1 1 d . . .
P1 P 0.55719(8) 0.07900(5) 0.13919(3) 0.0221(2) Uani 1 1 d . . .
N1 N 0.3491(3) 0.00785(16) 0.09436(9) 0.0243(7) Uani 1 1 d . . .
N2 N 0.6291(2) 0.22286(16) 0.08048(9) 0.0211(6) Uani 1 1 d . . .
N3 N 0.3017(3) 0.25982(18) 0.18999(10) 0.0303(7) Uani 1 1 d . A .
Cl1 Cl 0.23787(9) 0.18889(5) 0.07964(3) 0.0360(2) Uani 1 1 d . . .
Cl2 Cl 0.59274(9) 0.36363(5) 0.14489(3) 0.0347(2) Uani 1 1 d . . .
O1 O 0.6062(2) 0.00324(15) 0.11818(9) 0.0361(7) Uani 1 1 d . . .
O2 O 0.3696(2) -0.11697(14) 0.08948(10) 0.0398(7) Uani 1 1 d . . .
O3 O 0.6816(2) 0.11967(12) 0.14809(7) 0.0246(5) Uani 1 1 d . . .
O4 O 0.7991(2) 0.19117(17) 0.05002(8) 0.0387(7) Uani 1 1 d . . .
C1 C 0.5520(3) -0.0492(2) 0.08995(12) 0.0271(8) Uani 1 1 d . . .
C2 C 0.4179(3) -0.0483(2) 0.09223(12) 0.0270(8) Uani 1 1 d . . .
C3 C 0.2433(4) -0.1060(2) 0.09443(17) 0.0491(12) Uani 1 1 d . . .
H3A H 0.2162 -0.1260 0.1217 0.059 Uiso 1 1 calc R . .
H3B H 0.1994 -0.1316 0.0718 0.059 Uiso 1 1 calc R . .
C4 C 0.2245(3) -0.0212(2) 0.09230(12) 0.0290(8) Uani 1 1 d . . .
C5 C 0.7753(3) 0.1431(2) 0.11973(12) 0.0294(8) Uani 1 1 d . . .
C6 C 0.7254(3) 0.1878(2) 0.08325(10) 0.0239(8) Uani 1 1 d . . .
C7 C 0.7475(3) 0.2482(2) 0.02250(13) 0.0379(10) Uani 1 1 d . . .
H7A H 0.7533 0.2328 -0.0072 0.045 Uiso 1 1 calc R . .
H7B H 0.7876 0.2971 0.0261 0.045 Uiso 1 1 calc R . .
C8 C 0.6199(3) 0.2526(2) 0.03632(11) 0.0254(8) Uani 1 1 d . . .
C9 C 0.6003(4) -0.1247(2) 0.10361(14) 0.0379(10) Uani 1 1 d . . .
H9A H 0.6868 -0.1236 0.1028 0.057 Uiso 1 1 calc R . .
H9B H 0.5713 -0.1639 0.0847 0.057 Uiso 1 1 calc R . .
H9C H 0.5741 -0.1356 0.1322 0.057 Uiso 1 1 calc R . .
C10 C 0.5891(4) -0.0290(3) 0.04585(13) 0.0443(11) Uani 1 1 d . . .
H10A H 0.5598 0.0213 0.0389 0.066 Uiso 1 1 calc R . .
H10B H 0.5560 -0.0655 0.0262 0.066 Uiso 1 1 calc R . .
H10C H 0.6754 -0.0295 0.0439 0.066 Uiso 1 1 calc R . .
C11 C 0.1696(4) 0.0023(3) 0.05117(14) 0.0490(12) Uani 1 1 d . . .
H11A H 0.1754 0.0568 0.0481 0.074 Uiso 1 1 calc R . .
H11B H 0.0864 -0.0128 0.0507 0.074 Uiso 1 1 calc R . .
H11C H 0.2115 -0.0221 0.0280 0.074 Uiso 1 1 calc R . .
C12 C 0.1554(4) 0.0084(3) 0.12927(15) 0.0496(12) Uani 1 1 d . . .
H12A H 0.1979 -0.0031 0.1552 0.074 Uiso 1 1 calc R . .
H12B H 0.0774 -0.0153 0.1300 0.074 Uiso 1 1 calc R . .
H12C H 0.1462 0.0629 0.1266 0.074 Uiso 1 1 calc R . .
C13 C 0.8449(4) 0.0747(2) 0.10487(15) 0.0458(11) Uani 1 1 d . . .
H13A H 0.8683 0.0444 0.1291 0.069 Uiso 1 1 calc R . .
H13B H 0.9156 0.0913 0.0898 0.069 Uiso 1 1 calc R . .
H13C H 0.7955 0.0444 0.0862 0.069 Uiso 1 1 calc R . .
C14 C 0.8518(4) 0.1947(2) 0.14501(13) 0.0424(11) Uani 1 1 d . . .
H14A H 0.8060 0.2389 0.1533 0.064 Uiso 1 1 calc R . .
H14B H 0.9196 0.2105 0.1281 0.064 Uiso 1 1 calc R . .
H14C H 0.8798 0.1684 0.1700 0.064 Uiso 1 1 calc R . .
C15 C 0.5706(4) 0.3316(2) 0.03523(13) 0.0420(11) Uani 1 1 d . . .
H15A H 0.4891 0.3313 0.0456 0.063 Uiso 1 1 calc R . .
H15B H 0.5719 0.3504 0.0064 0.063 Uiso 1 1 calc R . .
H15C H 0.6188 0.3643 0.0530 0.063 Uiso 1 1 calc R . .
C16 C 0.5433(4) 0.1989(3) 0.01168(13) 0.0406(10) Uani 1 1 d . . .
H16A H 0.5810 0.1494 0.0108 0.061 Uiso 1 1 calc R . .
H16B H 0.5333 0.2178 -0.0169 0.061 Uiso 1 1 calc R . .
H16C H 0.4659 0.1946 0.0252 0.061 Uiso 1 1 calc R . .
C17 C 0.5265(3) 0.0488(2) 0.19214(11) 0.0274(8) Uani 1 1 d . . .
C18 C 0.4249(4) 0.0719(2) 0.21177(12) 0.0363(10) Uani 1 1 d . . .
H18 H 0.3731 0.1054 0.1977 0.044 Uiso 1 1 calc R . .
C19 C 0.3967(4) 0.0472(3) 0.25178(14) 0.0490(12) Uani 1 1 d . . .
H19 H 0.3270 0.0645 0.2652 0.059 Uiso 1 1 calc R . .
C20 C 0.4697(5) -0.0019(3) 0.27156(15) 0.0554(14) Uani 1 1 d . . .
H20 H 0.4505 -0.0193 0.2988 0.067 Uiso 1 1 calc R . .
C21 C 0.5702(5) -0.0265(3) 0.25259(16) 0.0596(15) Uani 1 1 d . . .
H21 H 0.6207 -0.0605 0.2668 0.071 Uiso 1 1 calc R . .
C22 C 0.5997(4) -0.0022(2) 0.21256(14) 0.0423(11) Uani 1 1 d . . .
H22 H 0.6691 -0.0202 0.1993 0.051 Uiso 1 1 calc R . .
C23 C 0.3787(3) 0.25097(19) 0.16666(11) 0.0263(8) Uani 1 1 d . . .
C24 C 0.1955(4) 0.2636(2) 0.21556(13) 0.0405(11) Uani 1 1 d D . .
C25 C 0.1105(19) 0.3163(10) 0.1923(6) 0.058(5) Uani 0.50 1 d PDU A 2
H25A H 0.1454 0.3665 0.1906 0.088 Uiso 0.50 1 calc PR A 2
H25B H 0.0355 0.3189 0.2075 0.088 Uiso 0.50 1 calc PR A 2
H25C H 0.0966 0.2971 0.1640 0.088 Uiso 0.50 1 calc PR A 2
C25A C 0.1318(12) 0.1892(8) 0.2061(4) 0.041(3) Uani 0.50 1 d PDU A 1
H25D H 0.1160 0.1857 0.1760 0.061 Uiso 0.50 1 calc PR A 1
H25E H 0.0570 0.1875 0.2215 0.061 Uiso 0.50 1 calc PR A 1
H25F H 0.1817 0.1471 0.2148 0.061 Uiso 0.50 1 calc PR A 1
C26 C 0.2282(19) 0.3012(10) 0.2571(4) 0.093(6) Uani 0.50 1 d PDU A 2
H26A H 0.2790 0.2675 0.2734 0.140 Uiso 0.50 1 calc PR A 2
H26B H 0.1563 0.3119 0.2730 0.140 Uiso 0.50 1 calc PR A 2
H26C H 0.2704 0.3481 0.2515 0.140 Uiso 0.50 1 calc PR A 2
C26A C 0.128(2) 0.3357(10) 0.2045(6) 0.066(6) Uani 0.50 1 d PDU A 1
H26D H 0.1753 0.3795 0.2121 0.099 Uiso 0.50 1 calc PR A 1
H26E H 0.0530 0.3368 0.2200 0.099 Uiso 0.50 1 calc PR A 1
H26F H 0.1115 0.3366 0.1744 0.099 Uiso 0.50 1 calc PR A 1
C27 C 0.138(2) 0.1886(10) 0.2225(6) 0.107(8) Uani 0.50 1 d PDU A 2
H27A H 0.1191 0.1657 0.1955 0.161 Uiso 0.50 1 calc PR A 2
H27B H 0.0655 0.1952 0.2388 0.161 Uiso 0.50 1 calc PR A 2
H27C H 0.1924 0.1558 0.2379 0.161 Uiso 0.50 1 calc PR A 2
C27A C 0.2337(16) 0.2618(8) 0.2609(4) 0.057(4) Uani 0.50 1 d PDU A 1
H27D H 0.2732 0.2141 0.2668 0.085 Uiso 0.50 1 calc PR A 1
H27E H 0.1643 0.2670 0.2790 0.085 Uiso 0.50 1 calc PR A 1
H27F H 0.2884 0.3034 0.2663 0.085 Uiso 0.50 1 calc PR A 1

loop_
_atom_site_aniso_label
_atom_site_aniso_U_11
_atom_site_aniso_U_22
_atom_site_aniso_U_33
_atom_site_aniso_U_23
_atom_site_aniso_U_13
_atom_site_aniso_U_12
Pd1 0.01917(15) 0.02002(15) 0.02283(15) 0.00360(11) -0.00230(11) -0.00081(11)
Pd2 0.02038(15) 0.01967(15) 0.02069(15) 0.00058(10) 0.00317(11) -0.00044(11)
P1 0.0204(5) 0.0208(5) 0.0251(5) 0.0013(4) -0.0041(4) -0.0006(4)
N1 0.0187(15) 0.0231(16) 0.0311(16) 0.0033(13) -0.0038(13) -0.0016(13)
N2 0.0199(15) 0.0223(15) 0.0210(15) 0.0003(12) 0.0022(12) -0.0008(12)
N3 0.0286(18) 0.0371(19) 0.0251(16) 0.0013(14) 0.0070(14) 0.0005(15)
Cl1 0.0319(5) 0.0302(5) 0.0459(6) 0.0100(4) -0.0124(5) 0.0022(4)
Cl2 0.0372(6) 0.0258(5) 0.0412(5) -0.0088(4) 0.0068(4) -0.0045(4)
O1 0.0252(15) 0.0315(15) 0.0517(17) -0.0142(13) -0.0145(12) 0.0045(12)
O2 0.0301(15) 0.0218(14) 0.068(2) -0.0041(13) -0.0073(14) -0.0030(12)
O3 0.0211(13) 0.0237(13) 0.0289(13) 0.0032(10) -0.0049(11) -0.0045(11)
O4 0.0252(14) 0.0594(19) 0.0315(15) 0.0068(14) 0.0078(12) 0.0093(14)
C1 0.0256(19) 0.0229(19) 0.033(2) -0.0051(16) -0.0018(17) 0.0021(16)
C2 0.0244(19) 0.0242(19) 0.032(2) 0.0015(16) -0.0046(16) -0.0068(16)
C3 0.028(2) 0.031(2) 0.089(4) 0.003(2) -0.009(2) -0.0015(19)
C4 0.0194(18) 0.0223(18) 0.045(2) 0.0048(17) -0.0053(17) -0.0038(16)
C5 0.0215(19) 0.033(2) 0.033(2) 0.0080(17) -0.0003(16) 0.0015(17)
C6 0.0218(19) 0.0271(19) 0.0227(18) -0.0019(15) 0.0013(15) -0.0023(16)
C7 0.026(2) 0.057(3) 0.030(2) 0.0090(19) 0.0059(17) -0.003(2)
C8 0.026(2) 0.031(2) 0.0192(17) 0.0046(15) 0.0025(15) -0.0024(16)
C9 0.031(2) 0.030(2) 0.053(3) 0.0006(19) -0.0031(19) 0.0062(18)
C10 0.038(2) 0.057(3) 0.037(2) 0.005(2) -0.001(2) -0.011(2)
C11 0.045(3) 0.048(3) 0.054(3) 0.003(2) -0.024(2) -0.011(2)
C12 0.038(3) 0.051(3) 0.059(3) 0.006(2) 0.016(2) -0.009(2)
C13 0.026(2) 0.040(3) 0.071(3) 0.010(2) 0.010(2) 0.011(2)
C14 0.035(2) 0.053(3) 0.038(2) 0.014(2) -0.013(2) -0.024(2)
C15 0.057(3) 0.036(2) 0.033(2) 0.0114(19) 0.006(2) 0.006(2)
C16 0.042(3) 0.049(3) 0.030(2) 0.005(2) -0.009(2) -0.011(2)
C17 0.029(2) 0.0254(19) 0.0275(19) 0.0054(16) -0.0095(16) -0.0080(16)
C18 0.041(2) 0.039(2) 0.029(2) 0.0092(18) -0.0023(18) -0.0100(19)
C19 0.051(3) 0.060(3) 0.036(2) 0.011(2) 0.003(2) -0.017(2)
C20 0.073(4) 0.062(3) 0.032(2) 0.017(2) -0.010(3) -0.029(3)
C21 0.076(4) 0.055(3) 0.048(3) 0.023(3) -0.030(3) -0.006(3)
C22 0.046(3) 0.042(2) 0.039(2) 0.008(2) -0.012(2) -0.002(2)
C23 0.028(2) 0.0250(19) 0.0258(19) 0.0028(15) -0.0035(17) -0.0008(16)
C24 0.032(2) 0.054(3) 0.035(2) 0.003(2) 0.0176(19) 0.007(2)
C25 0.036(7) 0.073(10) 0.067(11) 0.012(8) 0.023(7) 0.025(8)
C25A 0.018(4) 0.060(7) 0.044(6) 0.012(5) 0.011(4) -0.013(5)
C26 0.105(12) 0.132(14) 0.043(8) -0.015(9) 0.030(7) 0.003(12)
C26A 0.051(9) 0.084(11) 0.062(10) -0.013(8) 0.018(7) 0.025(8)
C27 0.101(12) 0.087(11) 0.134(17) 0.015(11) 0.056(12) -0.024(10)
C27A 0.062(8) 0.077(9) 0.031(6) -0.009(6) 0.001(5) 0.006(8)

_geom_special_details            
;
 All esds (except the esd in the dihedral angle between two l.s. planes)
 are estimated using the full covariance matrix.  The cell esds are taken
 into account individually in the estimation of esds in distances, angles
 and torsion angles; correlations between esds in cell parameters are only
 used when they are defined by crystal symmetry.  An approximate (isotropic)
 treatment of cell esds is used for estimating esds involving l.s. planes.
;

loop_
_geom_bond_atom_site_label_1
_geom_bond_atom_site_label_2
_geom_bond_distance
_geom_bond_site_symmetry_2
_geom_bond_publ_flag
Pd1 P1 2.1553(9) . ?
Pd1 N1 2.175(3) . ?
Pd1 Cl1 2.3945(10) . ?
Pd1 Pd2 2.5230(4) . ?
Pd2 C23 1.909(4) . ?
Pd2 N2 2.087(3) . ?
Pd2 Cl2 2.4287(10) . ?
P1 O1 1.607(3) . ?
P1 O3 1.611(2) . ?
P1 C17 1.810(4) . ?
N1 C2 1.270(5) . ?
N1 C4 1.505(4) . ?
N2 C6 1.260(4) . ?
N2 C8 1.511(4) . ?
N3 C23 1.158(5) . ?
N3 C24 1.456(5) . ?
O1 C1 1.437(4) . ?
O2 C2 1.344(4) . ?
O2 C3 1.453(5) . ?
O3 C5 1.457(4) . ?
O4 C6 1.353(4) . ?
O4 C7 1.465(5) . ?
C1 C10 1.515(5) . ?
C1 C9 1.518(5) . ?
C1 C2 1.521(5) . ?
C3 C4 1.528(5) . ?
C3 H3A 0.9900 . ?
C3 H3B 0.9900 . ?
C4 C11 1.513(6) . ?
C4 C12 1.513(6) . ?
C5 C14 1.500(5) . ?
C5 C6 1.521(5) . ?
C5 C13 1.529(6) . ?
C7 C8 1.514(5) . ?
C7 H7A 0.9900 . ?
C7 H7B 0.9900 . ?
C8 C16 1.513(5) . ?
C8 C15 1.516(5) . ?
C9 H9A 0.9800 . ?
C9 H9B 0.9800 . ?
C9 H9C 0.9800 . ?
C10 H10A 0.9800 . ?
C10 H10B 0.9800 . ?
C10 H10C 0.9800 . ?
C11 H11A 0.9800 . ?
C11 H11B 0.9800 . ?
C11 H11C 0.9800 . ?
C12 H12A 0.9800 . ?
C12 H12B 0.9800 . ?
C12 H12C 0.9800 . ?
C13 H13A 0.9800 . ?
C13 H13B 0.9800 . ?
C13 H13C 0.9800 . ?
C14 H14A 0.9800 . ?
C14 H14B 0.9800 . ?
C14 H14C 0.9800 . ?
C15 H15A 0.9800 . ?
C15 H15B 0.9800 . ?
C15 H15C 0.9800 . ?
C16 H16A 0.9800 . ?
C16 H16B 0.9800 . ?
C16 H16C 0.9800 . ?
C17 C18 1.373(5) . ?
C17 C22 1.393(5) . ?
C18 C19 1.390(6) . ?
C18 H18 0.9500 . ?
C19 C20 1.361(7) . ?
C19 H19 0.9500 . ?
C20 C21 1.362(8) . ?
C20 H20 0.9500 . ?
C21 C22 1.392(7) . ?
C21 H21 0.9500 . ?
C22 H22 0.9500 . ?
C24 C27 1.504(15) . ?
C24 C27A 1.512(12) . ?
C24 C26 1.533(14) . ?
C24 C25A 1.540(12) . ?
C24 C26A 1.538(15) . ?
C24 C25 1.537(14) . ?
C25 H25A 0.9800 . ?
C25 H25B 0.9800 . ?
C25 H25C 0.9800 . ?
C25A H25D 0.9800 . ?
C25A H25E 0.9800 . ?
C25A H25F 0.9800 . ?
C26 H26A 0.9800 . ?
C26 H26B 0.9800 . ?
C26 H26C 0.9800 . ?
C26A H26D 0.9800 . ?
C26A H26E 0.9800 . ?
C26A H26F 0.9800 . ?
C27 H27A 0.9800 . ?
C27 H27B 0.9800 . ?
C27 H27C 0.9800 . ?
C27A H27D 0.9800 . ?
C27A H27E 0.9800 . ?
C27A H27F 0.9800 . ?

loop_
_geom_angle_atom_site_label_1
_geom_angle_atom_site_label_2
_geom_angle_atom_site_label_3
_geom_angle
_geom_angle_site_symmetry_1
_geom_angle_site_symmetry_3
_geom_angle_publ_flag
P1 Pd1 N1 89.04(8) . . ?
P1 Pd1 Cl1 170.14(4) . . ?
N1 Pd1 Cl1 99.74(8) . . ?
P1 Pd1 Pd2 79.72(3) . . ?
N1 Pd1 Pd2 168.64(8) . . ?
Cl1 Pd1 Pd2 91.60(3) . . ?
C23 Pd2 N2 171.82(13) . . ?
C23 Pd2 Cl2 95.31(11) . . ?
N2 Pd2 Cl2 92.54(8) . . ?
C23 Pd2 Pd1 83.60(11) . . ?
N2 Pd2 Pd1 88.44(8) . . ?
Cl2 Pd2 Pd1 176.66(3) . . ?
O1 P1 O3 98.63(13) . . ?
O1 P1 C17 101.98(17) . . ?
O3 P1 C17 97.85(15) . . ?
O1 P1 Pd1 112.45(10) . . ?
O3 P1 Pd1 128.76(9) . . ?
C17 P1 Pd1 113.24(13) . . ?
C2 N1 C4 107.6(3) . . ?
C2 N1 Pd1 125.0(2) . . ?
C4 N1 Pd1 126.9(2) . . ?
C6 N2 C8 107.4(3) . . ?
C6 N2 Pd2 128.2(2) . . ?
C8 N2 Pd2 124.3(2) . . ?
C23 N3 C24 171.8(4) . . ?
C1 O1 P1 131.4(2) . . ?
C2 O2 C3 105.7(3) . . ?
C5 O3 P1 131.1(2) . . ?
C6 O4 C7 104.8(3) . . ?
O1 C1 C10 108.1(3) . . ?
O1 C1 C9 104.1(3) . . ?
C10 C1 C9 112.3(3) . . ?
O1 C1 C2 112.9(3) . . ?
C10 C1 C2 108.6(3) . . ?
C9 C1 C2 110.9(3) . . ?
N1 C2 O2 118.1(3) . . ?
N1 C2 C1 128.6(3) . . ?
O2 C2 C1 113.2(3) . . ?
O2 C3 C4 105.4(3) . . ?
O2 C3 H3A 110.7 . . ?
C4 C3 H3A 110.7 . . ?
O2 C3 H3B 110.7 . . ?
C4 C3 H3B 110.7 . . ?
H3A C3 H3B 108.8 . . ?
N1 C4 C11 109.2(3) . . ?
N1 C4 C12 109.4(3) . . ?
C11 C4 C12 111.7(4) . . ?
N1 C4 C3 102.0(3) . . ?
C11 C4 C3 111.7(4) . . ?
C12 C4 C3 112.5(4) . . ?
O3 C5 C14 105.2(3) . . ?
O3 C5 C6 110.9(3) . . ?
C14 C5 C6 107.8(3) . . ?
O3 C5 C13 109.9(3) . . ?
C14 C5 C13 111.0(3) . . ?
C6 C5 C13 111.8(3) . . ?
N2 C6 O4 117.2(3) . . ?
N2 C6 C5 129.4(3) . . ?
O4 C6 C5 113.3(3) . . ?
O4 C7 C8 104.0(3) . . ?
O4 C7 H7A 111.0 . . ?
C8 C7 H7A 111.0 . . ?
O4 C7 H7B 111.0 . . ?
C8 C7 H7B 111.0 . . ?
H7A C7 H7B 109.0 . . ?
N2 C8 C16 107.7(3) . . ?
N2 C8 C7 100.9(3) . . ?
C16 C8 C7 111.3(3) . . ?
N2 C8 C15 111.9(3) . . ?
C16 C8 C15 111.4(3) . . ?
C7 C8 C15 113.2(3) . . ?
C1 C9 H9A 109.5 . . ?
C1 C9 H9B 109.5 . . ?
H9A C9 H9B 109.5 . . ?
C1 C9 H9C 109.5 . . ?
H9A C9 H9C 109.5 . . ?
H9B C9 H9C 109.5 . . ?
C1 C10 H10A 109.5 . . ?
C1 C10 H10B 109.5 . . ?
H10A C10 H10B 109.5 . . ?
C1 C10 H10C 109.5 . . ?
H10A C10 H10C 109.5 . . ?
H10B C10 H10C 109.5 . . ?
C4 C11 H11A 109.5 . . ?
C4 C11 H11B 109.5 . . ?
H11A C11 H11B 109.5 . . ?
C4 C11 H11C 109.5 . . ?
H11A C11 H11C 109.5 . . ?
H11B C11 H11C 109.5 . . ?
C4 C12 H12A 109.5 . . ?
C4 C12 H12B 109.5 . . ?
H12A C12 H12B 109.5 . . ?
C4 C12 H12C 109.5 . . ?
H12A C12 H12C 109.5 . . ?
H12B C12 H12C 109.5 . . ?
C5 C13 H13A 109.5 . . ?
C5 C13 H13B 109.5 . . ?
H13A C13 H13B 109.5 . . ?
C5 C13 H13C 109.5 . . ?
H13A C13 H13C 109.5 . . ?
H13B C13 H13C 109.5 . . ?
C5 C14 H14A 109.5 . . ?
C5 C14 H14B 109.5 . . ?
H14A C14 H14B 109.5 . . ?
C5 C14 H14C 109.5 . . ?
H14A C14 H14C 109.5 . . ?
H14B C14 H14C 109.5 . . ?
C8 C15 H15A 109.5 . . ?
C8 C15 H15B 109.5 . . ?
H15A C15 H15B 109.5 . . ?
C8 C15 H15C 109.5 . . ?
H15A C15 H15C 109.5 . . ?
H15B C15 H15C 109.5 . . ?
C8 C16 H16A 109.5 . . ?
C8 C16 H16B 109.5 . . ?
H16A C16 H16B 109.5 . . ?
C8 C16 H16C 109.5 . . ?
H16A C16 H16C 109.5 . . ?
H16B C16 H16C 109.5 . . ?
C18 C17 C22 118.7(4) . . ?
C18 C17 P1 120.0(3) . . ?
C22 C17 P1 121.2(3) . . ?
C17 C18 C19 121.2(4) . . ?
C17 C18 H18 119.4 . . ?
C19 C18 H18 119.4 . . ?
C20 C19 C18 119.4(5) . . ?
C20 C19 H19 120.3 . . ?
C18 C19 H19 120.3 . . ?
C19 C20 C21 120.5(4) . . ?
C19 C20 H20 119.7 . . ?
C21 C20 H20 119.7 . . ?
C20 C21 C22 120.7(5) . . ?
C20 C21 H21 119.7 . . ?
C22 C21 H21 119.7 . . ?
C17 C22 C21 119.4(5) . . ?
C17 C22 H22 120.3 . . ?
C21 C22 H22 120.3 . . ?
N3 C23 Pd2 176.2(3) . . ?
N3 C24 C27 113.5(9) . . ?
N3 C24 C27A 107.4(8) . . ?
C27 C24 C27A 87.9(10) . . ?
N3 C24 C26 107.8(9) . . ?
C27 C24 C26 111.4(11) . . ?
N3 C24 C25A 103.8(6) . . ?
C27A C24 C25A 107.7(8) . . ?
C26 C24 C25A 131.3(9) . . ?
N3 C24 C26A 108.8(10) . . ?
C27 C24 C26A 124.2(14) . . ?
C27A C24 C26A 112.3(9) . . ?
C26 C24 C26A 87.4(10) . . ?
C25A C24 C26A 116.1(11) . . ?
N3 C24 C25 105.9(9) . . ?
C27 C24 C25 110.2(13) . . ?
C27A C24 C25 130.9(10) . . ?
C26 C24 C25 107.7(11) . . ?
C25A C24 C25 97.9(10) . . ?
C24 C25 H25A 109.5 . . ?
C24 C25 H25B 109.5 . . ?
H25A C25 H25B 109.5 . . ?
C24 C25 H25C 109.5 . . ?
H25A C25 H25C 109.5 . . ?
H25B C25 H25C 109.5 . . ?
C24 C25A H25D 109.5 . . ?
C24 C25A H25E 109.5 . . ?
C24 C25A H25F 109.5 . . ?
C24 C26 H26A 109.5 . . ?
C24 C26 H26B 109.5 . . ?
H26A C26 H26B 109.5 . . ?
C24 C26 H26C 109.5 . . ?
H26A C26 H26C 109.5 . . ?
H26B C26 H26C 109.5 . . ?
C24 C26A H26D 109.5 . . ?
C24 C26A H26E 109.5 . . ?
C24 C26A H26F 109.5 . . ?
C24 C27 H27A 109.5 . . ?
C24 C27 H27B 109.5 . . ?
H27A C27 H27B 109.5 . . ?
C24 C27 H27C 109.5 . . ?
H27A C27 H27C 109.5 . . ?
H27B C27 H27C 109.5 . . ?
C24 C27A H27D 109.5 . . ?
C24 C27A H27E 109.5 . . ?
C24 C27A H27F 109.5 . . ?

_diffrn_measured_fraction_theta_max 1.000
_diffrn_reflns_theta_full        27.00
_diffrn_measured_fraction_theta_full 1.000
_refine_diff_density_max         0.707
_refine_diff_density_min         -0.856
_refine_diff_density_rms         0.212
